# Supplementary material
Source: publisher figshare collection journal article supplement (https://acs.figshare.com/ndownloader/files/4349074)

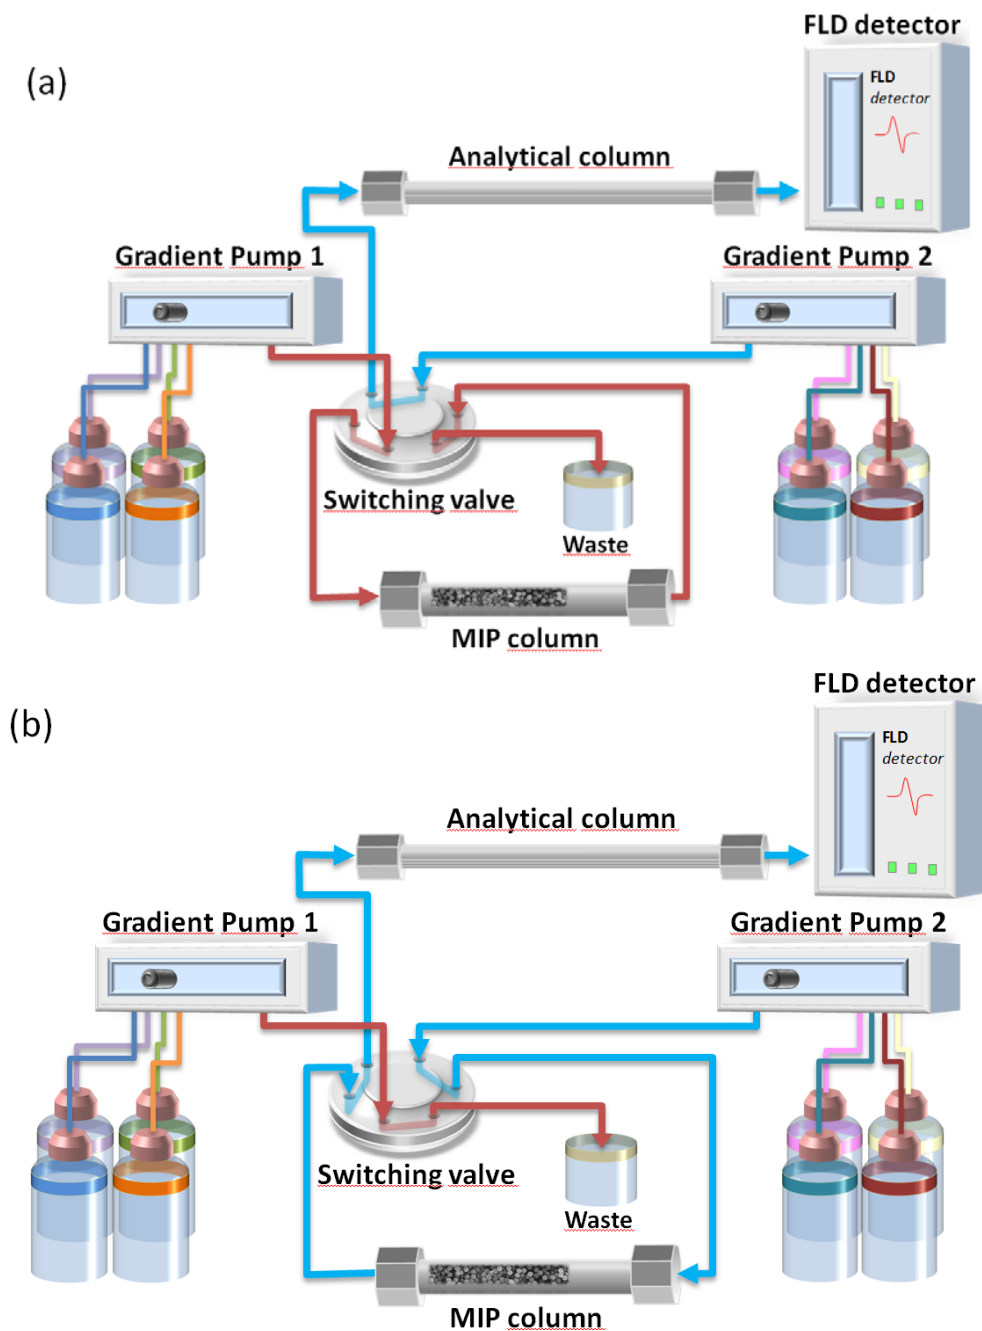

**Figure 1S.** Experimental set-up of the on-line MISPE-LC-FLD system. (a) conditioning, loading and washing; (b) elution and chromatographic separation.

**Figure 2S.** Scanning electron micrographs of the MIP materials synthesized using ENRO as the template, MAA and HEMA as functional monomers, and EDMA as the crosslinker (ratio 1:4:4:10).

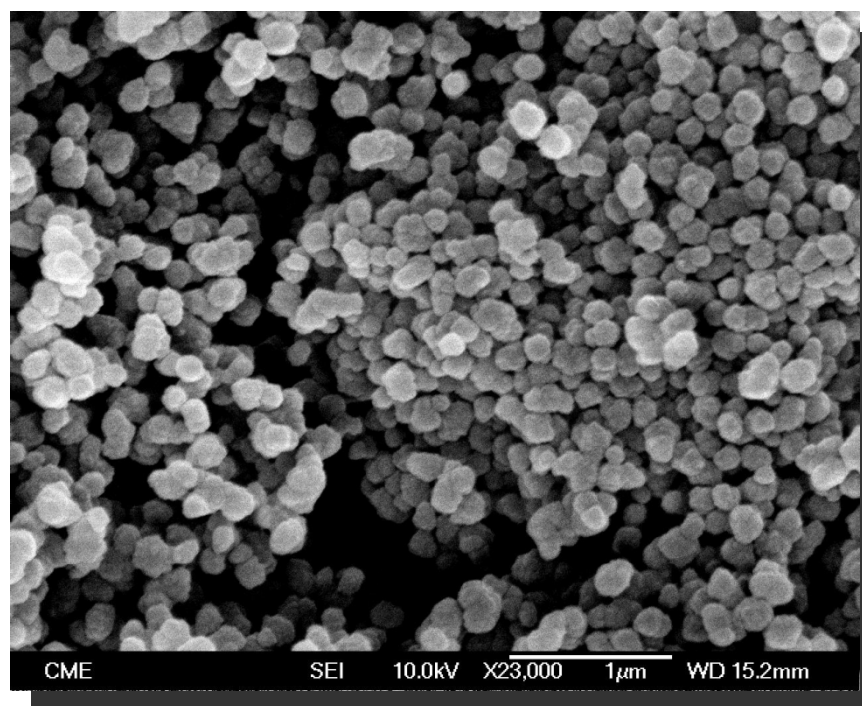

**Figure 3S.** Scanning electron micrographs of the (A) MIP and (B) NIP materials applied in the optimized on-line MISPE coupled to LC-FLD method.

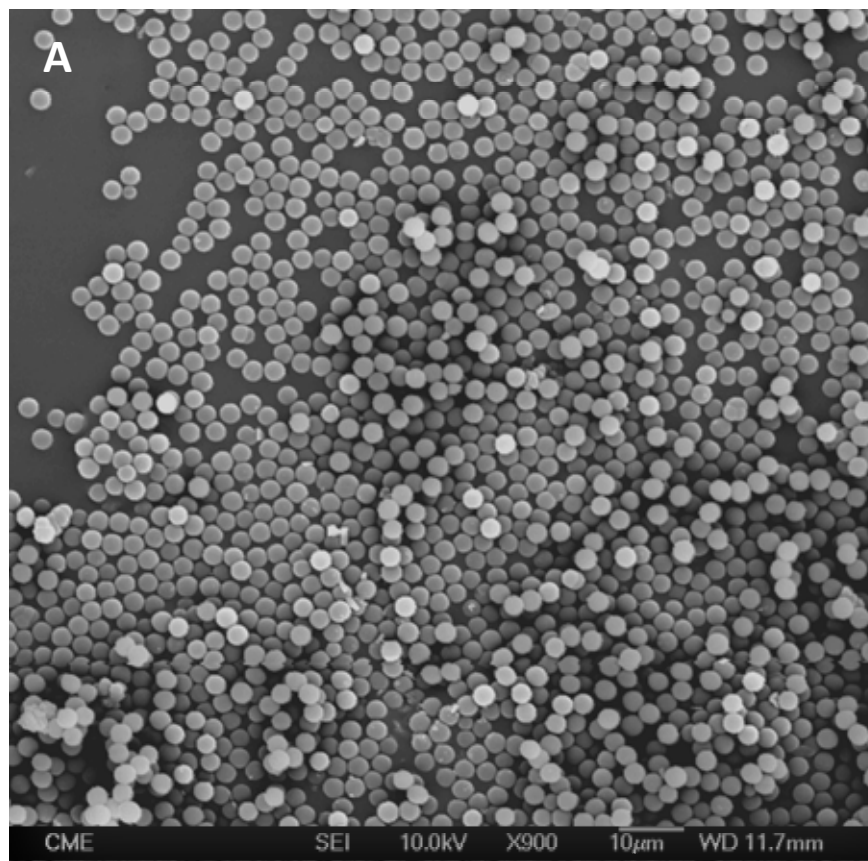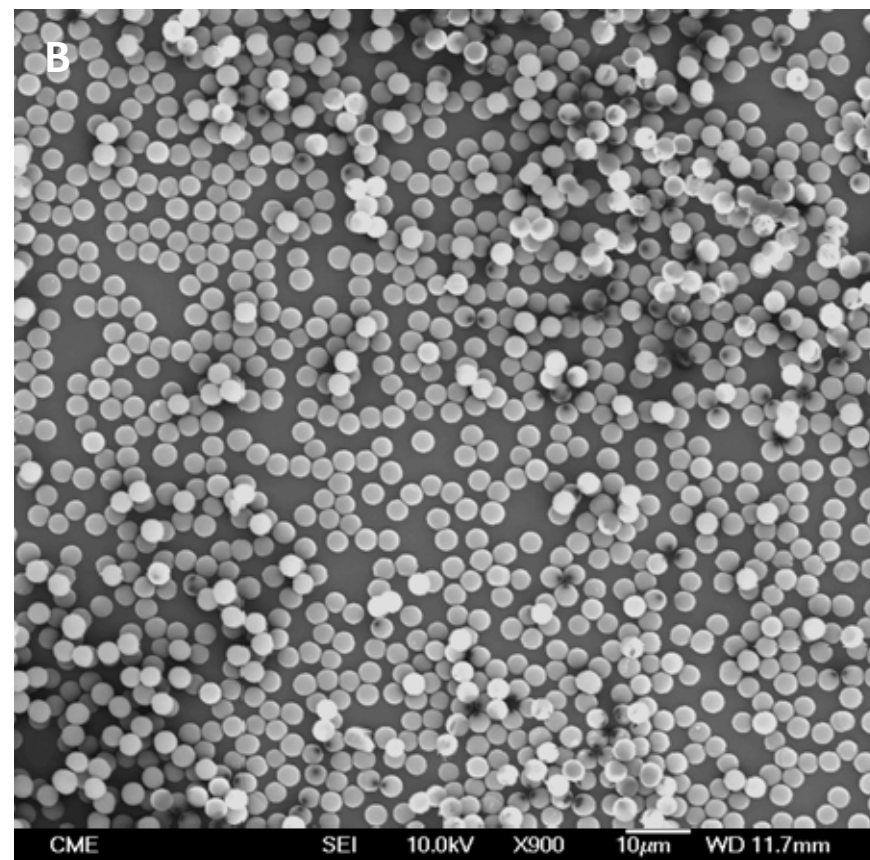

Supplement: Supplementary file 1 [file 4349074]
